# Supplementary material for: An efficient NiCu@C/Al2O3 catalyst for selective hydrogenation of acetylene
Source: Royal Society of Chemistry journal article supplement (doi:10.1039/d2cc04384j), 2022-01-01
Supplement: d2cc04384j1.pdf [file d2cc04384j1.pdf]

## Supplementary Information

### **An efficient NiCu@C/Al<sub>2</sub>O<sub>3</sub> catalyst for selective hydrogenation of acetylene**

Shihong Zhou,<sup>a</sup> Chenyang Lu,<sup>\*a</sup> Wenyu Zhou,<sup>a</sup> Yi Bi,<sup>a</sup> Cailong Zhou,<sup>a</sup> Aonan Zeng,<sup>b</sup> Anjie Wang,<sup>b</sup> Luxi Tan,<sup>a</sup>  
Lichun Dong<sup>\*a</sup>

## Table of Contents

|                                                                                                                                                                                                                                                       |              |
|-------------------------------------------------------------------------------------------------------------------------------------------------------------------------------------------------------------------------------------------------------|--------------|
| <b>Experiment section</b>                                                                                                                                                                                                                             | <b>P3-P4</b> |
| <b>Figures</b>                                                                                                                                                                                                                                        |              |
| <b>Fig. S1.</b> N <sub>2</sub> adsorption-desorption isotherms of Al <sub>2</sub> O <sub>3</sub> , NiCuCO <sub>3</sub> <sup>2</sup> /Al <sub>2</sub> O <sub>3</sub> , NiCu/Al <sub>2</sub> O <sub>3</sub> and NiCu@C/Al <sub>2</sub> O <sub>3</sub> . | <b>P5</b>    |
| <b>Fig. S2.</b> TEM images of (a) NiCu@C/Al <sub>2</sub> O <sub>3</sub> , (b) NiCu <sub>2</sub> @C/Al <sub>2</sub> O <sub>3</sub> and (c) Ni <sub>3</sub> Cu <sub>10</sub> @C/Al <sub>2</sub> O <sub>3</sub> .                                        | <b>P5</b>    |
| <b>Fig. S3.</b> HRTEM image of NiCu@C/Al <sub>2</sub> O <sub>3</sub> .                                                                                                                                                                                | <b>P6</b>    |
| <b>Fig. S4.</b> HRTEM image of NiCu/Al <sub>2</sub> O <sub>3</sub> .                                                                                                                                                                                  | <b>P6</b>    |
| <b>Fig. S5.</b> Ethane selectivity of different catalysts as a function of reaction temperature.                                                                                                                                                      | <b>P7</b>    |
| <b>Fig. S6.</b> Oligomer selectivity of different catalysts as a function of reaction temperature.                                                                                                                                                    | <b>P7</b>    |
| <b>Fig. S7.</b> NH <sub>3</sub> -TPD curves of NiCu@C/Al <sub>2</sub> O <sub>3</sub> and NiCu/Al <sub>2</sub> O <sub>3</sub> .                                                                                                                        | <b>P8</b>    |
| <b>Fig. S8.</b> Acetylene conversion and ethylene selectivity with time on stream over NiCu@C/Al <sub>2</sub> O <sub>3</sub> at 90 °C.                                                                                                                | <b>P8</b>    |
| <b>Fig. S9.</b> SEM images of (a) NiCu@C/Al <sub>2</sub> O <sub>3</sub> and (b) NiCu/Al <sub>2</sub> O <sub>3</sub> after 40 h usage.                                                                                                                 | <b>P9</b>    |
| <b>Fig. S10.</b> TG curves of fresh and used (a) NiCu@C/Al <sub>2</sub> O <sub>3</sub> and (b) NiCu/Al <sub>2</sub> O <sub>3</sub> under air.                                                                                                         | <b>P9</b>    |
| <b>Tables</b>                                                                                                                                                                                                                                         |              |
| <b>Table S1.</b> Physical properties of Al <sub>2</sub> O <sub>3</sub> , NiCuCO <sub>3</sub> <sup>2</sup> /Al <sub>2</sub> O <sub>3</sub> , NiCu/Al <sub>2</sub> O <sub>3</sub> and NiCu@C/Al <sub>2</sub> O <sub>3</sub> .                           | <b>P10</b>   |
| <b>Table S2.</b> Elemental analysis of carbon.                                                                                                                                                                                                        | <b>P10</b>   |
| <b>Table S3.</b> Comparison of catalytic performance over Ni-based catalysts.                                                                                                                                                                         | <b>P11</b>   |
| <b>References</b>                                                                                                                                                                                                                                     | <b>P12</b>   |

# 1. Experiment section

## 1.1 Preparation of NiCu@C/Al<sub>2</sub>O<sub>3</sub> catalysts

Firstly, stoichiometric Cu(NO<sub>3</sub>)<sub>2</sub>·3H<sub>2</sub>O and Ni(NO<sub>3</sub>)<sub>2</sub>·6H<sub>2</sub>O were dissolved in 200 mL deionized water to make a mixed solution. A certain amount of γ-Al<sub>2</sub>O<sub>3</sub> was added to the above mixed solution under stirring for 5 h. After that, Na<sub>2</sub>CO<sub>3</sub> solution was added to the mixture under vigorous stirring until pH = 10. After stirring for another 1 h, the obtained suspension was filtered and washed with deionized water to neutral. After drying for 12 h in vacuum oven, the solid was grounded to powder for further used as the catalyst precursor (denoted as NiCuCO<sub>3</sub><sup>2</sup>/Al<sub>2</sub>O<sub>3</sub>).

The obtained NiCuCO<sub>3</sub><sup>2</sup>/Al<sub>2</sub>O<sub>3</sub> was treated in an acetylene-containing gas (10.0% C<sub>2</sub>H<sub>2</sub> and 90.0% N<sub>2</sub>) at 120°C for 2 h with a heating rate of 3 °C·min<sup>-1</sup>. Then, the temperature was increased to 400 °C at a rate of 3 °C·min<sup>-1</sup> in the N<sub>2</sub> atmosphere for 1h. And then the gas was switched to H<sub>2</sub> for 3 h to obtain the Ni-Cu@C/Al<sub>2</sub>O<sub>3</sub>. For comparison, the NiCu/Al<sub>2</sub>O<sub>3</sub> without carbon encapsulation was prepared without the treatment of the acetylene-containing gas.

## 1.2 Catalyst characterization

The crystal structure of catalysts was observed using an X-ray diffractometer (XRD) (PANalytical X'Pert Powder) with the CuKα radiation source (λ= 0.154 nm) at the scanning rate of 10 °·min<sup>-1</sup> and the 2θ range is from 10° to 80°. Transmission electron microscopy (TEM), scanning transmission electron microscopy (STEM) and energy-dispersive X-ray spectroscopy (EDS) elemental mapping images were obtained on a Talos F200S microscope. X-ray photoelectron spectroscopy (XPS) characterization were obtained through a Scientific K-Alpha spectrometer with radiation of Al Kα (hν=1486.6 eV). The calibration peak is the C 1s peak at 284.8 eV. The images of morphology were taken on a Quattro S scanning electron microscope (SEM). The specific surface area

and the pore size distributions were calculated according to Bruner-Emmett-Teller (BET) method, and the physical adsorption and desorption of nitrogen at -196°C was measured by Micromeritics Tristar II 3020 instrument. The temperature programmed desorption of ammonia (NH<sub>3</sub>-TPD) curves were obtained by Chembet-3000 instrument with a thermal conductivity detector (TCD) detector. Elemental analysis was carried out on a Vario EL Elemental analyzer. The thermal properties of catalysts in the flow of air were analyzed using a TG/DTA X70 thermogravimetric analyzer.

### 1.3 Catalytic Performance

The selective hydrogenation of acetylene was performed in a fixed-bed micro-reactor equipped with a 10 mm inner diameter quartz reaction tube which contained 0.1 g catalyst precursor and the catalysts were prepared *in situ* as described above. The reaction took place ranging from 80°C to 130°C with the feed gas (0.5% C<sub>2</sub>H<sub>2</sub>/ 10.0% H<sub>2</sub>/ balance N<sub>2</sub>) at a total flow rate of 30 mL·min<sup>-1</sup> under the normal pressure. The gas composition before and after the reaction was analyzed by online gas chromatography (Nexis GC-2030) which was equipped with an FID detector and a capillary column (30 m × 0.535 mm × 15.00 μm). Acetylene conversion and product selectivity were calculated as follows.

$$C_2H_2 \text{ conversion} = \frac{C_2H_2(\text{inlet}) - C_2H_2(\text{outlet})}{C_2H_2(\text{inlet})} \times 100\%$$

$$C_2H_6 \text{ selectivity} = \frac{C_2H_6(\text{outlet}) - C_2H_2(\text{inlet})}{C_2H_2(\text{inlet}) - C_2H_2(\text{outlet})} \times 100\%$$

$$C_2H_4 \text{ selectivity} = \frac{C_2H_4(\text{outlet}) - C_2H_4(\text{inlet})}{C_2H_2(\text{inlet}) - C_2H_2(\text{outlet})} \times 100\%$$

The selectivity of oligomer was determined by difference.

The acetylene hydrogenation in ethylene stream was performed over NiCu@C/Al<sub>2</sub>O<sub>3</sub> with a mixture gas of 0.5% C<sub>2</sub>H<sub>2</sub>/ 10.0% H<sub>2</sub>/ balance C<sub>2</sub>H<sub>4</sub>. And the selectivity to ethylene was obtained as : S(C<sub>2</sub>H<sub>4</sub>) = 1 - S(C<sub>2</sub>H<sub>6</sub>) - S(C<sub>4</sub>).

## 2. Figures

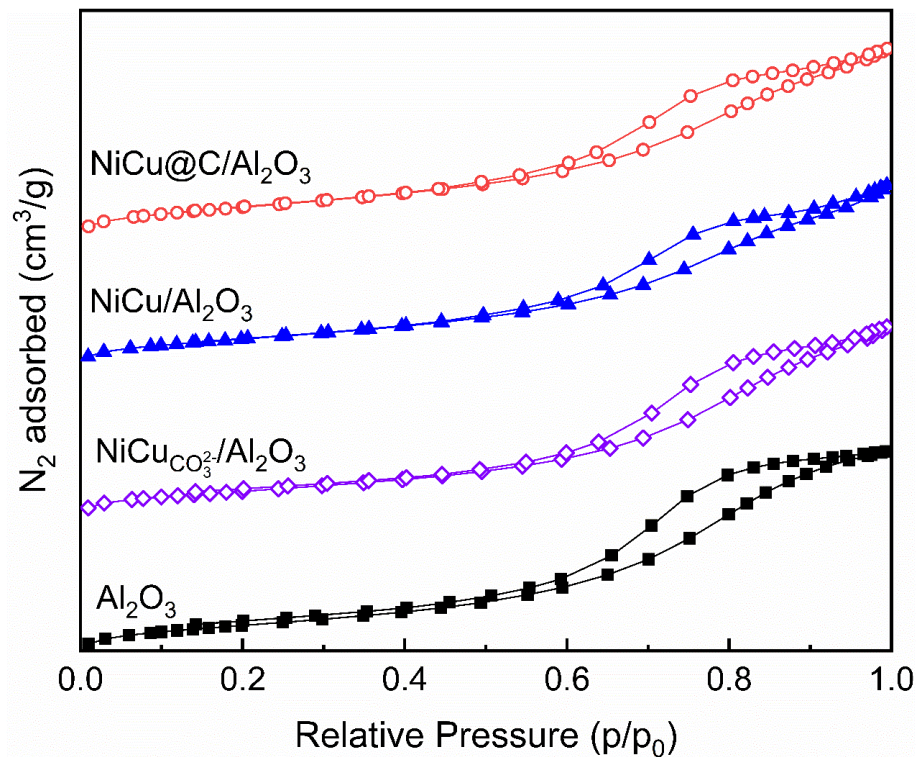

**Fig. S1.** N<sub>2</sub> adsorption-desorption isotherms of Al<sub>2</sub>O<sub>3</sub>, NiCuCO<sub>3</sub>/Al<sub>2</sub>O<sub>3</sub>, NiCu/Al<sub>2</sub>O<sub>3</sub> and NiCu@C/Al<sub>2</sub>O<sub>3</sub>.

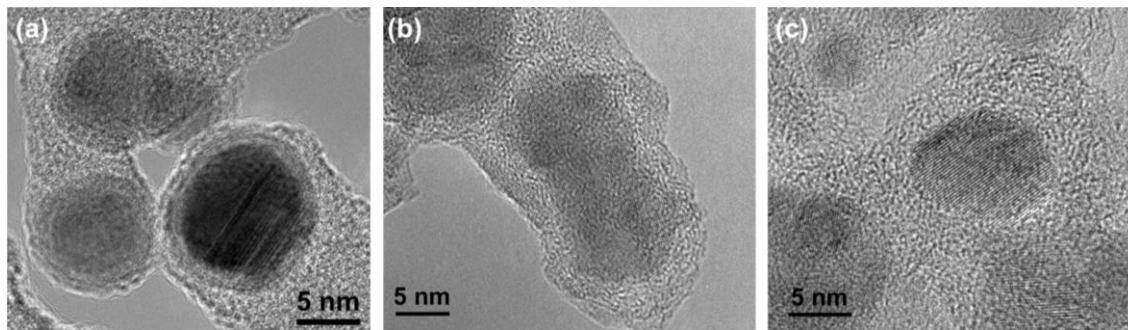

**Fig. S2.** TEM images of (a) NiCu@C/Al<sub>2</sub>O<sub>3</sub>, (b) NiCu<sub>2</sub>@C/Al<sub>2</sub>O<sub>3</sub> and (c) Ni<sub>3</sub>Cu<sub>10</sub>@C/Al<sub>2</sub>O<sub>3</sub>.

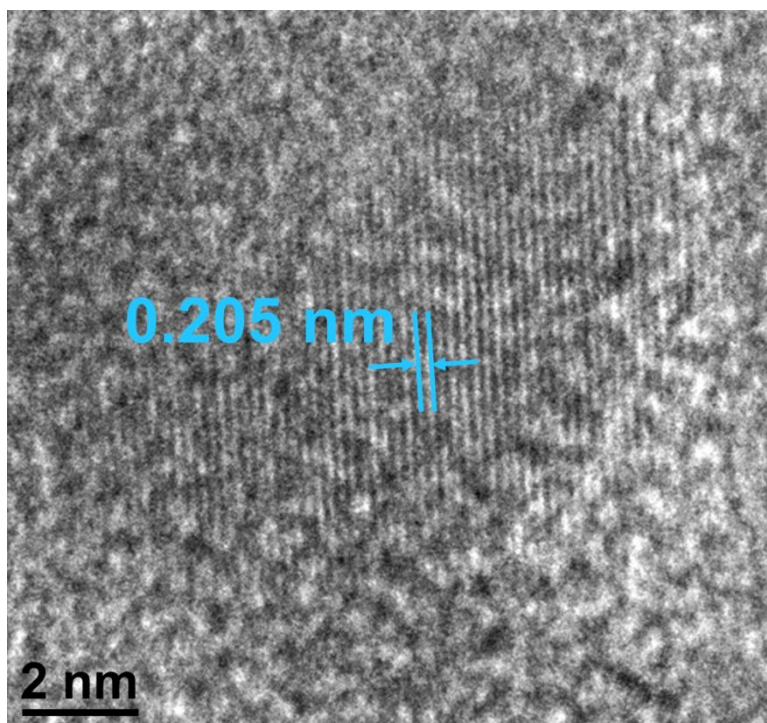

**Fig. S3.** HRTEM image of NiCu@C/Al<sub>2</sub>O<sub>3</sub>.

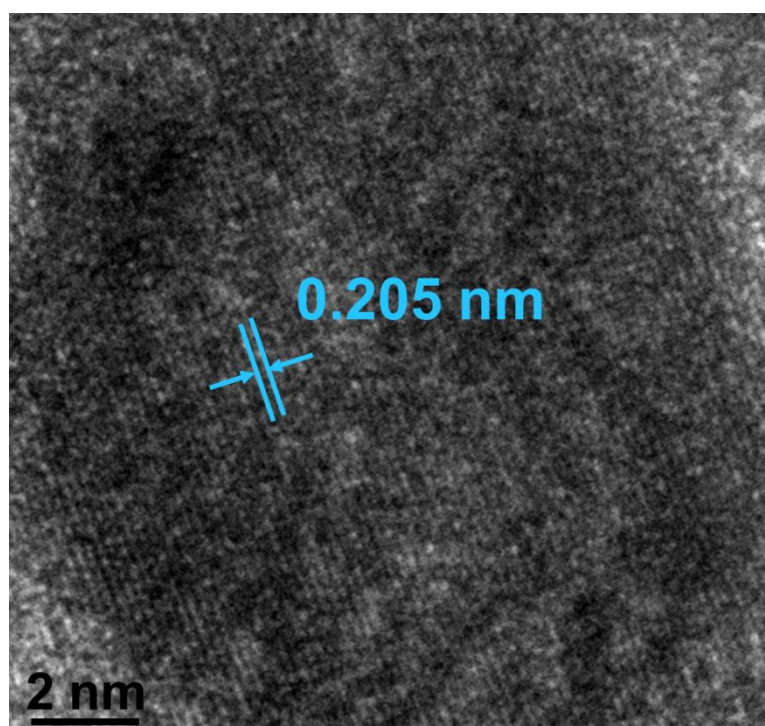

**Fig. S4.** HRTEM image of NiCu/Al<sub>2</sub>O<sub>3</sub>.

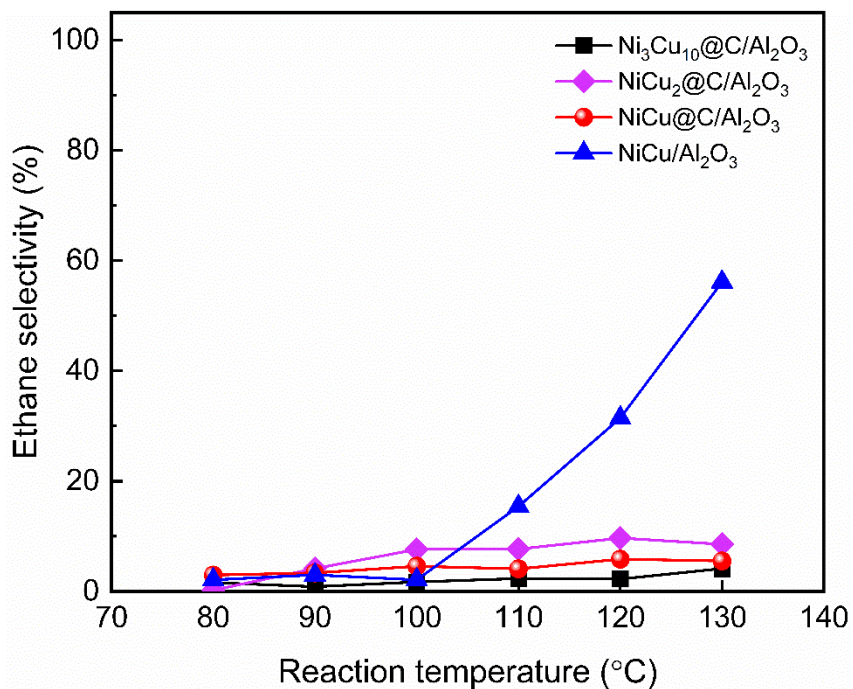

**Fig. S5.** Ethane selectivity of different catalysts as a function of reaction temperature.

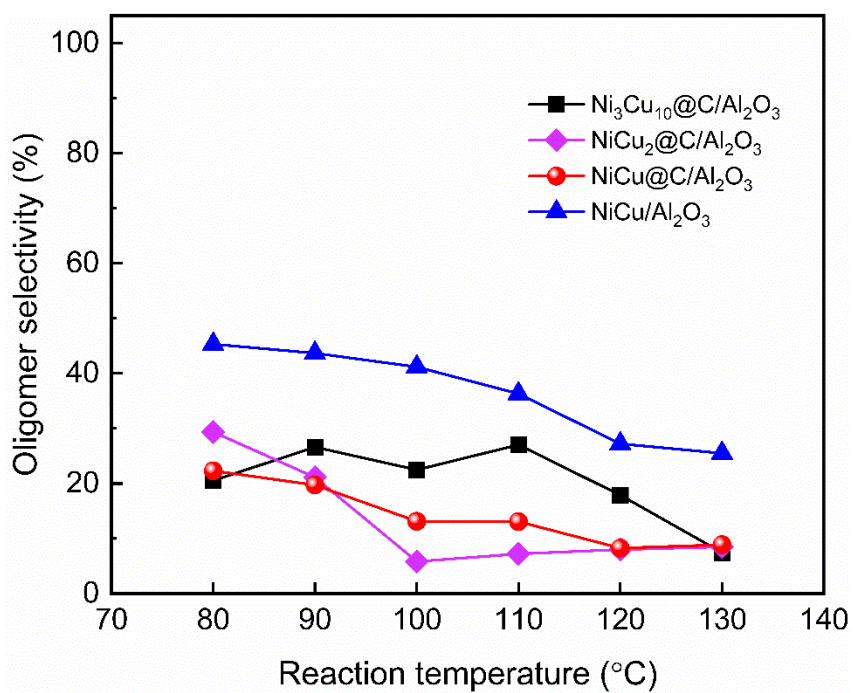

**Fig. S6.** Oligomer selectivity of different catalysts as a function of reaction temperature.

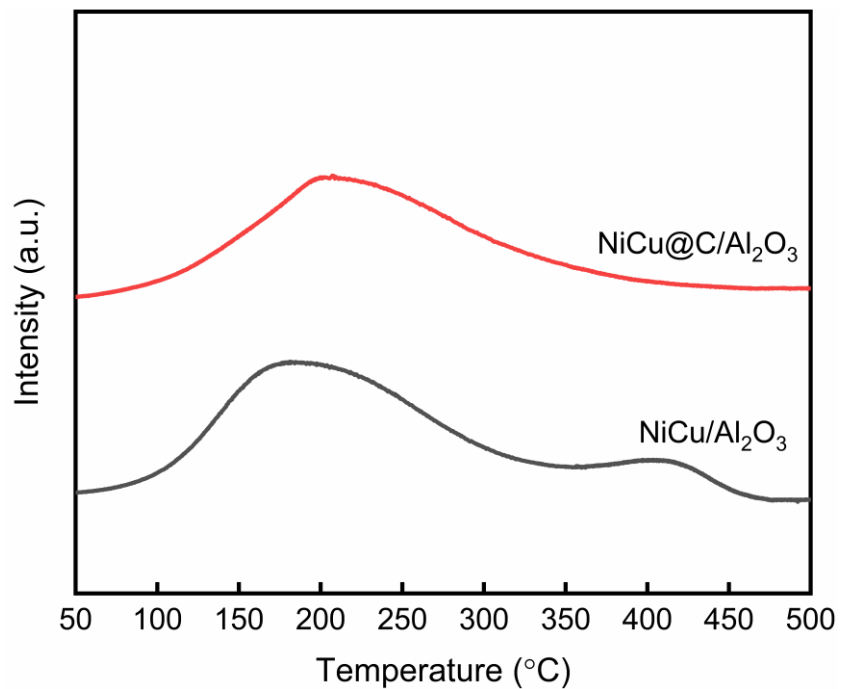

**Fig. S7.** NH<sub>3</sub>-TPD curves of NiCu@C/Al<sub>2</sub>O<sub>3</sub> and NiCu/Al<sub>2</sub>O<sub>3</sub>.

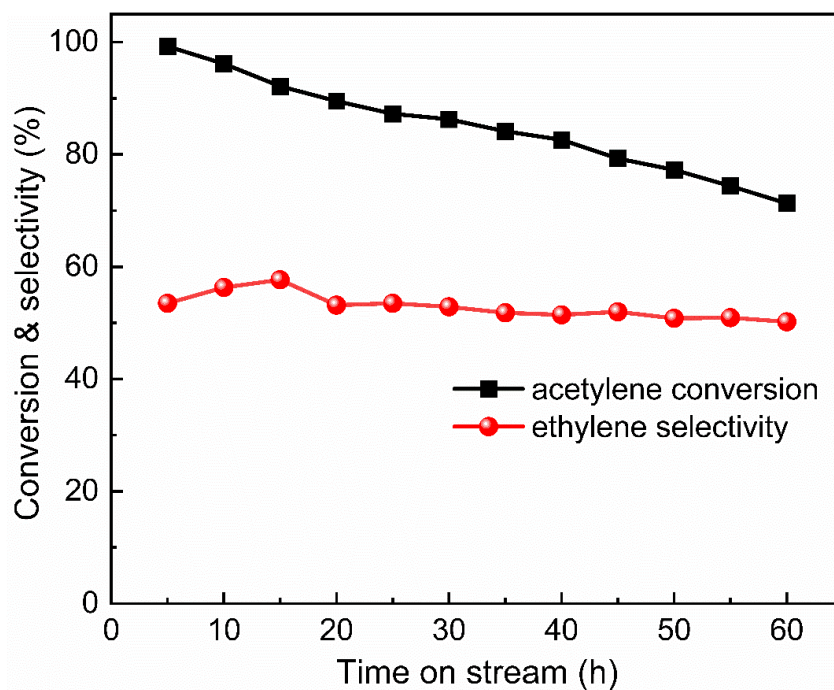

**Fig. S8.** Acetylene conversion and ethylene selectivity with time on stream over NiCu@C/Al<sub>2</sub>O<sub>3</sub> at 90 °C.



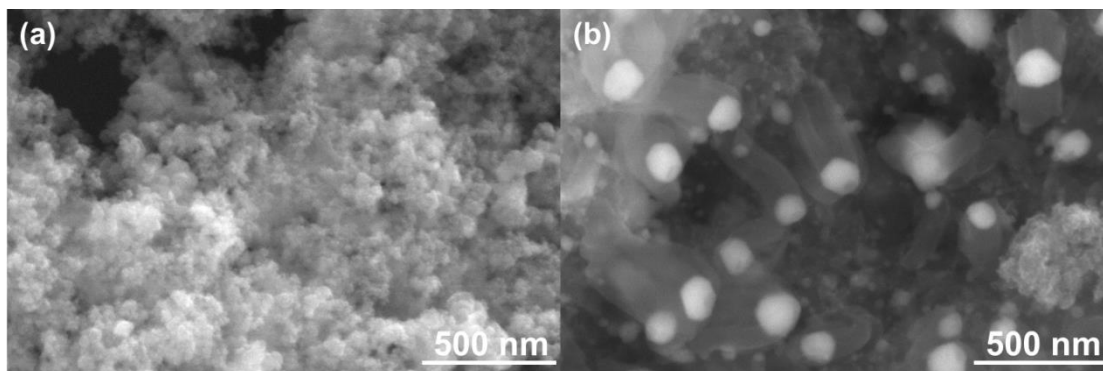

**Fig. S9.** SEM images of (a) NiCu@C/Al<sub>2</sub>O<sub>3</sub> and (b) NiCu/Al<sub>2</sub>O<sub>3</sub> after 40 h usage.

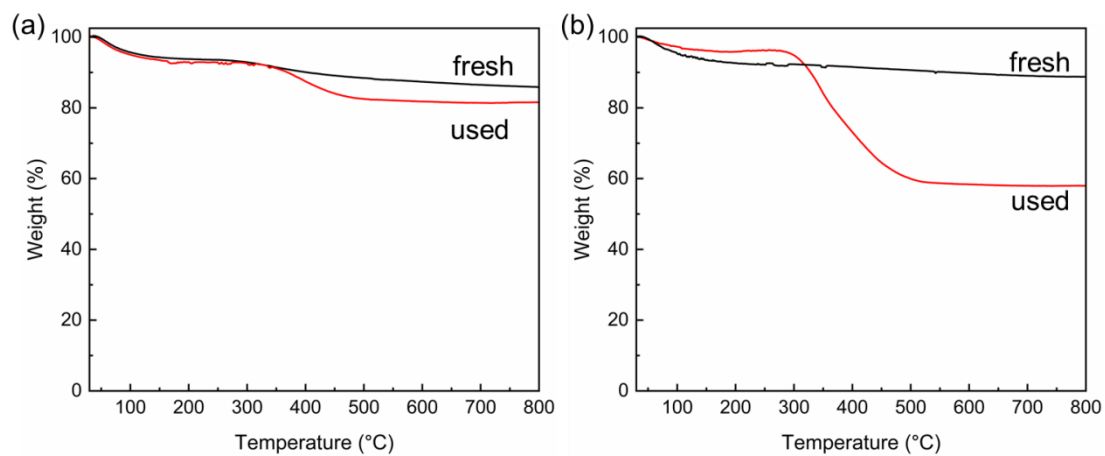

**Fig. S10.** TG curves of fresh and used (a) NiCu@C/Al<sub>2</sub>O<sub>3</sub> and (b) NiCu/Al<sub>2</sub>O<sub>3</sub> under air.

### 3. Tables

**Table S1.** Physical properties of Al<sub>2</sub>O<sub>3</sub>, NiCuCo<sub>3</sub><sup>2</sup>/Al<sub>2</sub>O<sub>3</sub>, NiCu/Al<sub>2</sub>O<sub>3</sub> and NiCu@C/Al<sub>2</sub>O<sub>3</sub>.

| Catalysts                                                        | BET surface area (m <sup>2</sup> /g) | Pore volume (cm <sup>3</sup> /g) | Pore diameter (nm) |
|------------------------------------------------------------------|--------------------------------------|----------------------------------|--------------------|
| Al <sub>2</sub> O <sub>3</sub>                                   | 272                                  | 0.72                             | 7.13               |
| NiCuCo <sub>3</sub> <sup>2</sup> /Al <sub>2</sub> O <sub>3</sub> | 233                                  | 0.64                             | 7.84               |
| NiCu/Al <sub>2</sub> O <sub>3</sub>                              | 237                                  | 0.62                             | 7.44               |
| NiCu@C/Al <sub>2</sub> O <sub>3</sub>                            | 269                                  | 0.65                             | 7.22               |

**Table S2.** Elemental analysis of carbon.

| Catalysts   | NiCu@C/Al <sub>2</sub> O <sub>3</sub> | NiCu <sub>2</sub> @C/Al <sub>2</sub> O <sub>3</sub> | Ni <sub>3</sub> Cu <sub>10</sub> @C/Al <sub>2</sub> O <sub>3</sub> |
|-------------|---------------------------------------|-----------------------------------------------------|--------------------------------------------------------------------|
| wt % carbon | 1.1                                   | 1.6                                                 | 3.1                                                                |

**Table S3. Comparison of catalytic performance over Ni-based catalysts.**

| <b>Samples</b>                                                   | <b>T (°C)</b> | <b>Conversion (%)</b> | <b>Selectivity (%)</b> | <b>Reactants</b>                                                             | <b>Ref.</b> |
|------------------------------------------------------------------|---------------|-----------------------|------------------------|------------------------------------------------------------------------------|-------------|
| <b>Ni-Cu@C/Al<sub>2</sub>O<sub>3</sub></b>                       | 130           | 100                   | 88                     | C <sub>2</sub> H <sub>2</sub> +H <sub>2</sub>                                | This work   |
| <b>Ni-Cu@C/Al<sub>2</sub>O<sub>3</sub></b>                       | 140           | 100                   | 80                     | C <sub>2</sub> H <sub>2</sub> +H <sub>2</sub> +C <sub>2</sub> H <sub>4</sub> |             |
| <b>NiCu/CeO<sub>2</sub></b>                                      | 225           | 100                   | 72.7                   | C <sub>2</sub> H <sub>2</sub> +C <sub>2</sub> H <sub>4</sub>                 | [1]         |
| <b>NiCu/MMO</b>                                                  | 160           | 100                   | 70.2                   | C <sub>2</sub> H <sub>2</sub> +H <sub>2</sub> +C <sub>2</sub> H <sub>4</sub> | [2]         |
| <b>Ni/MCM-41</b>                                                 | 250           | 100                   | 47                     | C <sub>2</sub> H <sub>2</sub> +H <sub>2</sub>                                | [3]         |
| <b>Ni/AC-N-0.5</b>                                               | 200           | 96                    | 46                     | C <sub>2</sub> H <sub>2</sub> +H <sub>2</sub>                                | [4]         |
| <b>NiGa</b>                                                      | 260           | 100                   | 82                     | C <sub>2</sub> H <sub>2</sub> +H <sub>2</sub>                                | [5]         |
| <b>Ni<sub>1</sub>Cu<sub>2</sub>/g-C<sub>3</sub>N<sub>4</sub></b> | 170           | 100                   | 90                     | C <sub>2</sub> H <sub>2</sub> +H <sub>2</sub> +C <sub>2</sub> H <sub>4</sub> | [6]         |
| <b>Na-Ni@CHA</b>                                                 | 180           | 100                   | 97                     | C <sub>2</sub> H <sub>2</sub> +H <sub>2</sub>                                | [7]         |
| <b>Ni-SAs/N-C</b>                                                | 200           | ~95                   | 90                     | C <sub>2</sub> H <sub>2</sub> +H <sub>2</sub> +C <sub>2</sub> H <sub>4</sub> | [8]         |
| <b>Ni/SiO<sub>2</sub>-Al<sub>2</sub>O<sub>3</sub></b>            | 175           | 8                     | 60                     | C <sub>2</sub> H <sub>2</sub> +H <sub>2</sub>                                | [9]         |
| <b>Ni/Al<sub>2</sub>O<sub>3</sub></b>                            | 200           | 12                    | 55                     | C <sub>2</sub> H <sub>2</sub> +H <sub>2</sub> +C <sub>2</sub> H <sub>4</sub> | [10]        |
| <b>Ni<sub>5</sub>Zn<sub>21</sub></b>                             | 160           | 75                    | 50                     | C <sub>2</sub> H <sub>2</sub> +H <sub>2</sub> +C <sub>2</sub> H <sub>4</sub> | [11]        |
| <b>NiZn/MgAl<sub>2</sub>O<sub>4</sub></b>                        | 120           | 75                    | 53                     | C <sub>2</sub> H <sub>2</sub> +H <sub>2</sub>                                | [12]        |

## References

- [1] Y. Liu, A. J. McCue, P. Yang, Y. He, L. Zheng, X. Cao, Y. Man, J. Feng, J. A. Anderson, D. Li, *Chem. Sci.*, **2019**, *10*, 3556-3566.
- [2] Y. Liu, J. Zhao, J. Feng, Y. He, Y. Du, D. Li, *J. Catal.*, **2018**, *359*, 251-260.
- [3] S. Zhou, L. Kang, Z. Xu, M. Zhu, *RSC Adv.*, **2020**, *10*, 1937-1945.
- [4] Z. Xu, S. Zhou, M. Zhu, *Catal. Commun.*, **2021**, *149*, 106241.
- [5] Y. Cao, H. Zhang, S. Ji, Z. Sui, Z. Jiang, D. Wang, F. Zaera, X. Zhou, X. Duan, Y. Li, *Angew. Chem. Int. Ed.*, **2020**, *59*, 11647-11652.
- [6] J. Gu, M. Jian, L. Huang, Z. Sun, A. Li, Y. Pan, J. Yang, W. Wen, W. Zhou, Y. Lin, H. J. Wang, X. Liu, L. Wang, X. Shi, X. Huang, L. Cao, S. Chen, X. Zheng, H. Pan, J. Zhu, S. Wei, W. X. Li, J. Lu, *Nat. Nanotechnol.*, **2021**, *16*, 1141-1149.
- [7] Y. Chai, G. Wu, X. Liu, Y. Ren, W. Dai, C. Wang, Z. Xie, N. Guan, L. Li, *J. Am. Chem. Soc.*, **2019**, *141*, 9920-9927.
- [8] X. Dai, Z. Chen, T. Yao, L. Zheng, Y. Lin, W. Liu, H. Ju, J. Zhu, X. Hong, S. Wei, Y. Wu, Y. Li, *Chem. Commun.*, **2017**, *53*, 11568-11571.
- [9] C. Guimon, A. Auroux, E. Romero, A. Monzon, *Appl. Catal., A*, **2003**, *251*, 199-214.
- [10] S. Abelló, D. Verboekend, B. Bridier, J. Pérez-Ramírez, *J. Catal.*, **2008**, *259*, 85-95.
- [11] C. S. Spanjers, J. T. Held, M. J. Jones, D. D. Stanley, R. S. Sim, M. J. Janik, R. M. Rioux, *J. Catal.*, **2014**, *316*, 164-173.
- [12] D. L. Trimm, N. W. Cant, I. O. Y. Liu, *Catal. Today*, **2011**, *178*, 181-186.
